# Supplementary material
Source: publisher figshare collection journal article supplement (https://tandf.figshare.com/ndownloader/files/14079758)
Supplement: Supplementary file 1 [file 14079758]

## SUPPLEMENTARY MATERIAL

### Synthesis and antitumor activity of camptothecin-4 $\beta$ -triazolopodophyllotoxin conjugates

Cheng-Ting Zi<sup>a,b,c,1</sup>, Liu Yang<sup>b,1</sup>, Fa-Wu, Dong<sup>b</sup>, Qing-Hua Kong<sup>b</sup>, Zhong-Tao Ding<sup>c</sup>, Jun Zhou<sup>b</sup>, Zi-Hua Jiang<sup>d,\*</sup>, Jiang-Miao Hu<sup>b,\*</sup>

<sup>a</sup> Key Laboratory of Pu-er Tea Science, Ministry of Education, College of Science, Yunnan Agricultural University, Kunming, 650201, China

<sup>b</sup> State Key Laboratory of Phytochemistry and Plant Resources in West China, Kunming Institute of Botany, Chinese Academy of Sciences, Kunming 650201, China

<sup>c</sup> Key Laboratory of Medicinal Chemistry for Nature Resource, Ministry of Education, School of Chemical Science and Technology, Yunnan University, Kunming 650091, China

<sup>d</sup> Department of Chemistry, Lakehead University, 955 Oliver Road, Thunder Bay, ON P7B 5E1, Canada

<sup>1</sup> These authors contributed equally to this work

\* Authors to whom correspondence should be addressed; E-Mails: zjiang@lakeheadu.ca (Z.-H.J.); hujiangmiao@mail.kib.ac.cn (J.-M.H.); Tel.: +1-807-766-7171 (Z.-H.J.); +86-871-6522-3264 (J.-M.H.); Fax: +1-807-346-7775 (Z.-H.J.); +86-871-6522-3261 (J.-M.H.).

**Abstract:** Two compounds (**9** and **10**) having a camptothecin (CPT) analog conjugated to the 4 $\beta$ -azido-4-deoxypodophyllotoxin analog by utilizing the copper-catalyzed azide-alkyne cycloaddition (CuAAC) reaction, and were evaluated for their cytotoxicity against a panel of five human cancer cell lines (HL-60, SMMC-7721, A-549, MCF-7 and SW480) using the MTT (3-(4,5-dimethyl-thiazol-2-yl)-2,5-diphenyltetrazolium bromide) assay. Two novel conjugates shown weak cytotoxicity, compound **10** showed highly potent against HL-60 cell line tested, with IC<sub>50</sub> value 17.69 $\pm$ 0.19  $\mu$ M. This compound suggested its potential as anticancer agents for further development.

**Keywords:** antitumor activity; CuAAC reaction; camptothecin; podophyllotoxin

## 1. Experimental

### 1.1. General information

Melting points were measured by an X-4 melting point apparatus and were uncorrected. MS data were obtained in the ESI mode on API Qstar Pulsar instrument; HRMS data were obtained in the ESI mode on LCMS-IT-TOF (Shimadzu, Kyoto, Japan); NMR spectra were acquired on Bruker AV-400 (Bruker BioSpin GmbH, Rheinstetten, Germany) instruments, using tetramethylsilane (TMS) as an internal standard: chemical shifts ( $\delta$ ) are given in ppm, coupling constants ( $J$ ) in Hz, the solvent signals were used as references ( $\text{CDCl}_3$ :  $\delta_{\text{C}} = 77.2$  ppm; residual  $\text{CHCl}_3$  in  $\text{CDCl}_3$ :  $\delta_{\text{H}} = 7.26$  ppm;  $\text{CD}_3\text{OD}$ :  $\delta_{\text{C}} = 49.0$  ppm; residual  $\text{CH}_3\text{OH}$  in  $\text{CD}_3\text{OD}$ :  $\delta_{\text{H}} = 4.78$  ppm). Column chromatography (CC): silica gel (200 – 300 mesh; Qingdao Makall Group CO., LTD; Qingdao; China). All reaction was monitored using thin-layer chromatography (TLC) on silica gel plates.

### 1.2. General procedure for the synthesis of 4 $\beta$ -azido-podophyllotoxins 7 and 8

To a solution of podophyllotoxin **1** (5 mmol) in dry dichloromethane ( $\text{CH}_2\text{Cl}_2$ , 50 mL), sodium iodide (NaI, 15 mmol) was added and stirred for 5 min. To this stirred suspension  $\text{MeSO}_3\text{H}$  (15 mmol) was added dropwise with syringe at 0 °C and the stirring was continued for another 5 h at room temperature. Nitrogen was bubbled through the solution to drive off the excess hydrogen iodide. This solution was then evaporated *in vacuo* and used for the next reaction without further purification. To the above crude product a mixture of  $\text{H}_2\text{O}$ -acetone (50 mL, 1:1) and anhydrous barium carbonate ( $\text{BaCO}_3$ , 10 mmol) were added successively. After 30 min at 40 °C, the resultant mixture was diluted with  $\text{CH}_2\text{Cl}_2$  (100 mL), then poured into 10% Sodium thiosulfate ( $\text{NaS}_2\text{O}_4$ ) solution (500 mL). The organic layer over sodium sulfate

(Na<sub>2</sub>SO<sub>4</sub>) and the solvent removed *in vacuo*. The residue was dried *in vacuo* (Kanal et al. 2003; Hansen et al. 1993). To a solution of residue (1.0 mmol) and sodium azide (5.0 mmol) in trichloromethane (4 mL) was added trifluoroacetic acid (TFA, 13.2 mmol) dropwise. The reaction mixture was stirred for 1 h, but in order to avoid gel formation during the reaction it was necessary to add further TFA (52.8 mmol). The solution was neutralized with aqueous saturated sodium bicarbonate (NaHCO<sub>3</sub>). The phases were separated. The aqueous phase was extracted twice with CHCl<sub>3</sub> (20 mL). The combined organic phases were washed with water and dried over Na<sub>2</sub>SO<sub>4</sub>. Then the solvent was evaporation and the reaction mixture was chromatographed on silica gel to afford the product (Kuhn et al. 1969; Hansen et al. 1993).

#### **1.2.1. 4 $\beta$ -Azido-4-deoxypodophyllotoxin (7)**

Yield 60 %. <sup>1</sup>H-NMR (CDCl<sub>3</sub>, 400 MHz)  $\delta$  7.05 (s, 1H, C<sup>8</sup>-H), 6.63 (s, 1H, C<sup>5</sup>-H), 6.35 (s, 2H, C<sup>2'</sup>, C<sup>6'</sup>-H), 6.05 (d, 2H, *J* = 3.6 Hz, OCH<sub>2</sub>O), 5.11 (d, 1H, *J* = 3.5 Hz, C<sup>4</sup>-H), 4.65 (d, 1H, *J* = 5.3 Hz, C<sup>1</sup>-H), 4.36 (dd, 1H, *J* = 8.3 Hz, 7.4 Hz, C<sup>11</sup>-CH <sub>$\beta$</sub> ), 4.22 (dd, 1H, *J* = 8.6 Hz, 10.2 Hz, C<sup>11</sup>-CH <sub>$\alpha$</sub> ), 3.67 (s, 6H, 3', 5'-OCH<sub>3</sub>), 3.66 (s, 3H, 4'-OCH<sub>3</sub>), 3.21 (dd, 1H, *J* = 5.3 Hz, 14.0 Hz, C<sup>2</sup>-H), 3.12 (m, 1H, C<sup>3</sup>-H); <sup>13</sup>C-NMR (CDCl<sub>3</sub>, 100 MHz)  $\delta$  174.5 (C-12), 153.5 (C-3'), 153.5 (C-5'), 149.6 (C-7), 148.0 (C-6), 136.6 (C-1'), 136.6 (C-4'), 133.5 (C-9), 128.5 (C-10), 111.4 (C-5), 109.7 (C-8), 109.4 (C-2'), 109.4 (C-6'), 102.7 (OCH<sub>2</sub>O), 68.2 (C-11), 66.2 (C-4), 56.3 (3', 5'-OCH<sub>3</sub>), 44.5 (C-1), 41.6 (C-2), 37.8 (C-3); MS-ESI *m/z* (%): 462 ([M+Na]<sup>+</sup>, 100).

#### **1.2.2. 4 $\beta$ -Azido-4-deoxy-4'-demethypodophyllotoxin (8)**

Yield 40%. <sup>1</sup>H-NMR (CDCl<sub>3</sub>, 400MHz)  $\delta$  7.07 (s, 1H, C<sup>5</sup>-H), 6.60 (s, 1H, C<sup>8</sup>-H), 6.38

(s, 2H, C<sup>2'</sup>, C<sup>6'</sup>-H), 6.05 (d, 2H,  $J = 0.6$  Hz, OCH<sub>2</sub>O), 4.61 (q, 2H,  $J = 3.7$  Hz, 5.3 Hz, C<sup>4</sup>-H, C<sup>1</sup>-H), 4.36 (dd, 2H,  $J = 8.5$  Hz, 10.3 Hz, C<sup>11</sup>-CH<sub>2</sub>), 3.66 (s, 6H, C<sup>3'</sup>, C<sup>5'</sup>-OCH<sub>3</sub>), 3.11 (dd, 1H,  $J = 4.7$  Hz, 14.1 Hz, C<sup>2</sup>-H), 2.96 (m, 1H, C<sup>3</sup>-H); <sup>13</sup>C-NMR (CDCl<sub>3</sub>, 100 MHz)  $\delta$  174.3 (C-12), 148.9 (C-3'), 148.6 (C-5'), 148.0 (C-7), 148.0 (C-6), 136.0 (C-1'), 133.9 (C-4'), 131.2 (C-9), 129.4 (C-10), 110.8 (C-5), 109.2 (C-2'), 109.2 (C-6'), 107.5 (C-8), 102.6 (OCH<sub>2</sub>O), 70.9 (C-11), 63.9 (C-4), 56.4 (C<sup>3'</sup>, C<sup>5'</sup>-OCH<sub>3</sub>), 45.7 (C-1), 44.4 (C-2), 38.6 (C-3); MS-ESI  $m/z$  (%): 448 ([M+Na]<sup>+</sup>, 100).

Figure S1.  $^1\text{H}$ -NMR of compound 6

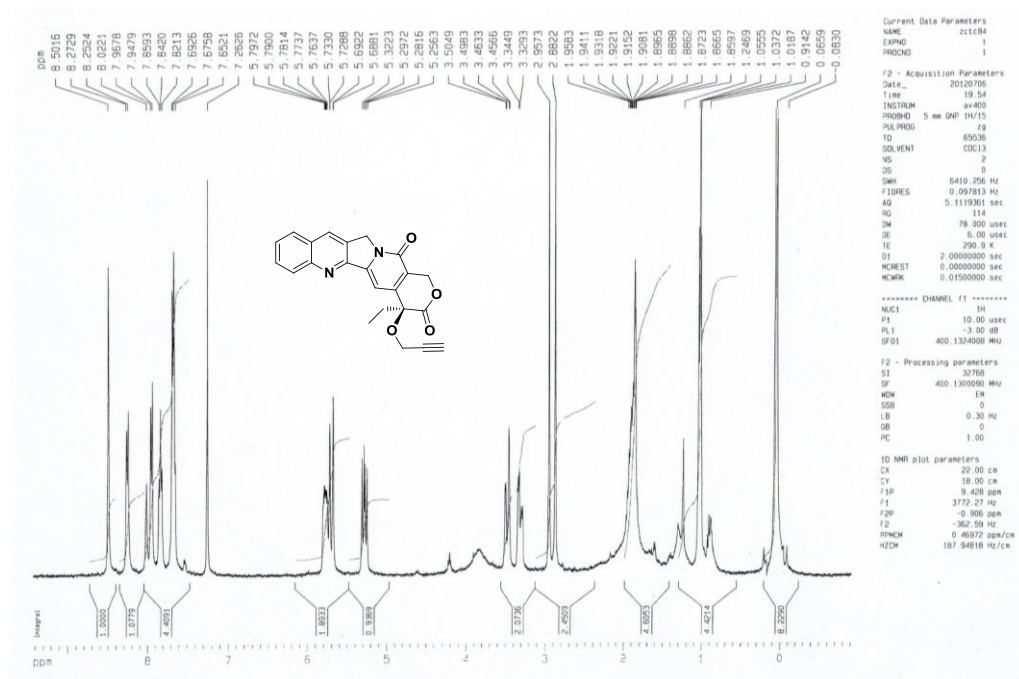

Figure S2.  $^{13}\text{C}$ -NMR of compound 6

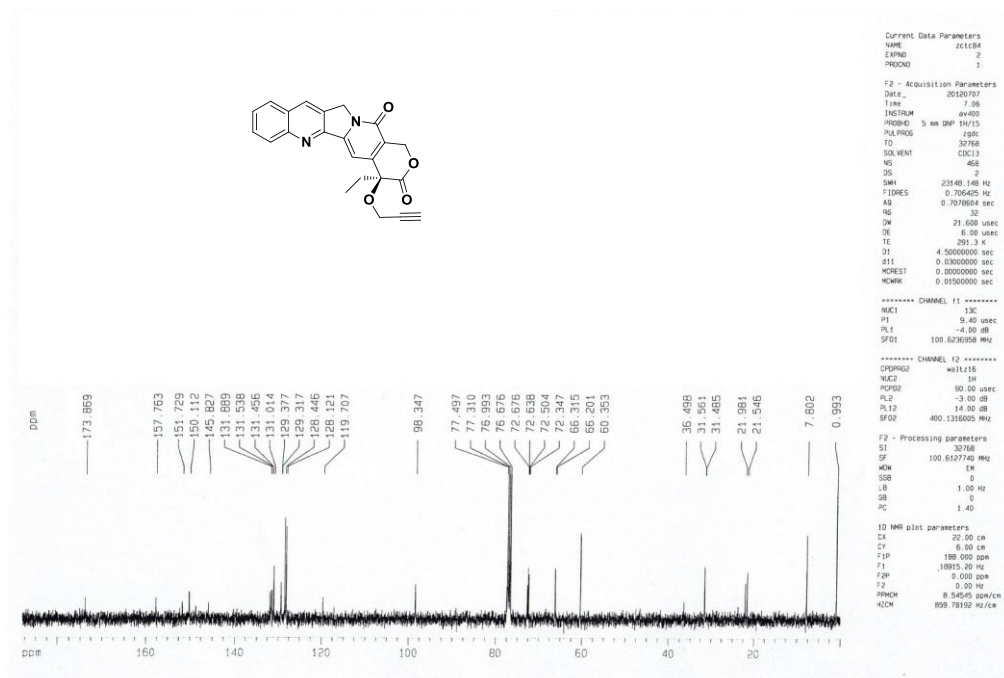

Figure S3.  $^1\text{H}$ -NMR of compound 7

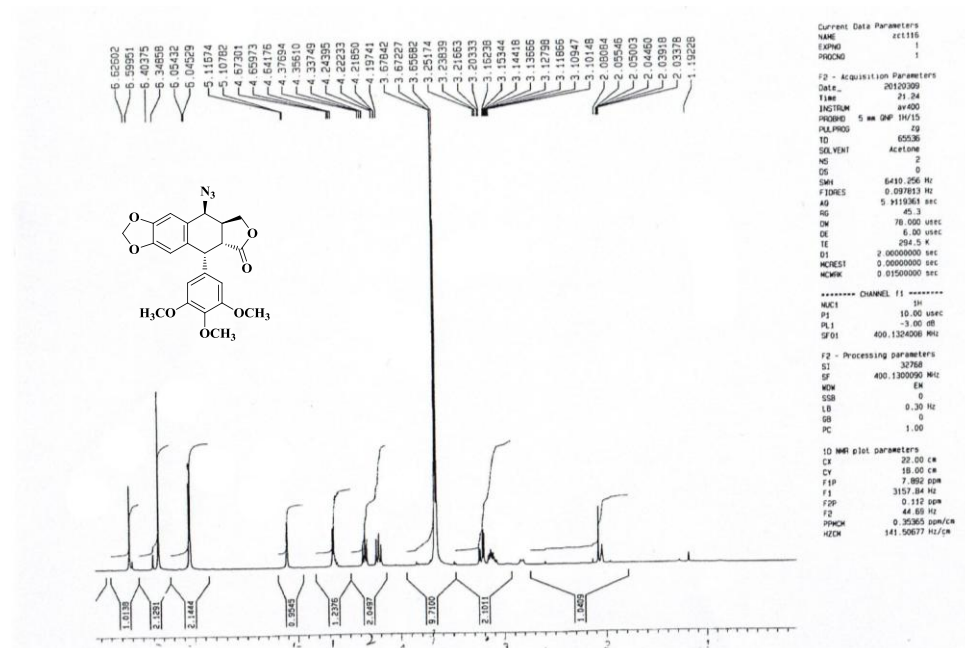

Figure S4.  $^{13}\text{C}$ -NMR of compound 7

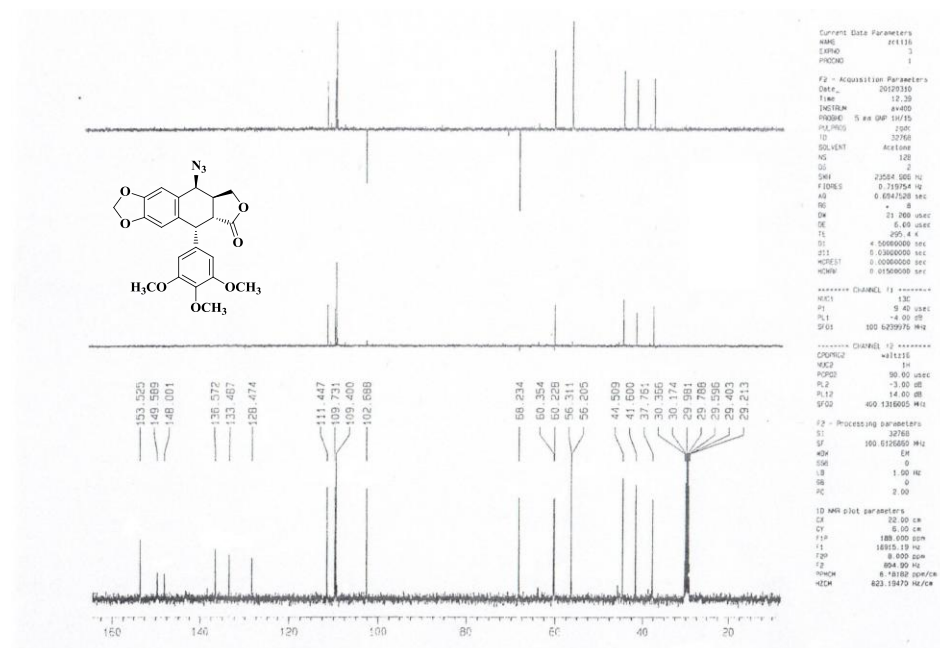

Chemical structure of **1-methyl-2-(3,4-dihydro-2H-benzofuran-2-yl)-3-methoxy-4-hydroxy-1,2,3,4-tetrahydronaphthalene** is shown above the spectrum.

<sup>1</sup>H NMR spectrum (CDCl<sub>3</sub>) showing peaks from 0 to 8 ppm. Integration values are provided below the baseline.

**Peak Data:**

| Chemical Shift (ppm) | Integration |
|----------------------|-------------|
| 7.176                | 1.0002      |
| 6.857                | 2.8091      |
| 6.599                | 1.1331      |
| 6.305                | 1.2010      |
| 3.939                | 1.7887      |
| 3.619                | 2.6501      |
| 3.264                | 1.8625      |
| 3.137                | 1.8301      |
| 2.957                | 0.8432      |
| 2.650                | 0.4451      |

**Acquisition Parameters:**

- NAME: zcl145
- EXPNO: 1
- PROCNO: 1
- F2 - Acquisition Parameters
- Date\_: 20120329
- Time: 21.00
- INSTRUM: av400
- PROBHD: 5 mm QNP 1H/13
- PULPROG: zg
- TD: 65536
- SOLVENT: Acetone
- NS: 2
- DS: 0
- SWH: 6410.256 Hz
- FIDRES: 0.057813 Hz
- AQ: 5.119361 sec
- RG: 36
- DM: 78.000 used
- DE: 6.00 used
- TE: 294.5 K
- Q1: 2.00000000 sec
- WCXST1: 0.00000000 sec
- NUC1: 13C

**Processing Parameters:**

- \*\*\*\*\* CHANNEL f1 \*\*\*\*\*
- NUC1: 13C
- P1: 10.00 use
- PL1: -3.00 dB
- SFO1: 400.1324080 MHz
- F2 - Processing Parameters
- SF: 32.768
- WDW: 400.1300000 MHz
- SSB: 0
- LB: 0.30 Hz
- GB: 0
- PC: 1.00

**1D NMR plot parameters:**

- CH: 22.00 cm
- CT: 24.00 cm
- F1P: 7.892 ppm
- F1: 3157.84 Hz
- F2P: 0.112 ppm
- F2: 44.59 Hz
- NUC1: 0.26339 cm
- HZCM: 141.56677 K/c

Chemical structure of 10a: 1-azido-2-methoxy-3-hydroxy-1,2,3,4-tetrahydronaphthalene.

Current Data Parameters

|        |        |
|--------|--------|
| NAME   | 201746 |
| EXPNO  | 3      |
| PROCNO | 1      |

F2 - Acquisition Parameters

|         |                |
|---------|----------------|
| Date_   | 20100310       |
| Time    | 13:42          |
| INSTRUM | nmr400         |
| PROBHD  | 5 mm QNP 1H/13 |
| PULPROG | zgpg30         |
| TD      | 30768          |
| SOLVENT | Acetone        |
| NS      | 144            |
| DS      | 2              |
| SWH     | 23564.906 Hz   |
| FIDRES  | 0.191974 Hz    |
| AQ      | 0.0047528 sec  |
| RG      | 181.3          |
| SW      | 21.000 MHz     |
| DE      | 6.00 MHz       |
| TE      | 296.1 K        |
| D1      | 4.5000000 sec  |
| d11     | 0.0000000 sec  |
| DELTA   | 0.0000000 sec  |
| DELTA2  | 0.0150000 sec  |

\*\*\*\*\* CHANNEL f1 \*\*\*\*\*

|     |                 |
|-----|-----------------|
| NM1 | 13C             |
| P1  | 8.40 MHz        |
| PL1 | -1.00 dB        |
| SF1 | 100.6260300 MHz |

\*\*\*\*\* CHANNEL f2 \*\*\*\*\*

|         |                 |
|---------|-----------------|
| CPDPRG2 | waltz16         |
| NM2     | 1H              |
| PCPD2   | 90.00 MHz       |
| PL2     | -2.00 dB        |
| PL12    | 14.00 dB        |
| SF02    | 400.1315000 MHz |

F2 - Processing parameters

|     |                 |
|-----|-----------------|
| SI  | 32768           |
| SF  | 100.6260300 MHz |
| WDW | EM              |
| SSB | 0               |
| LB  | 1.00 MHz        |
| GB  | 0               |
| PC  | 2.00            |

1D NMR plot parameters

|        |                  |
|--------|------------------|
| EX     | 22.00 cm         |
| CY     | 6.00 cm          |
| FAP    | 198.980 ppm      |
| F2P    | 18945.19 Hz      |
| F2M    | 6.000 ppm        |
| F2     | 604.80 MHz       |
| PPMPPM | 0.16168 ppm/Hz   |
| UTM    | 823.18470 MHz/Hz |

PPM

174.340  
148.912  
148.595  
147.593  
135.939  
133.918  
131.236  
129.377  
110.811  
109.195  
107.464  
102.592  
70.854  
63.500  
56.441  
45.748  
44.416  
38.959  
38.595  
30.259  
29.974  
29.782  
29.599  
29.397  
29.205

**Figure S7. HRESIMS of compound 9**

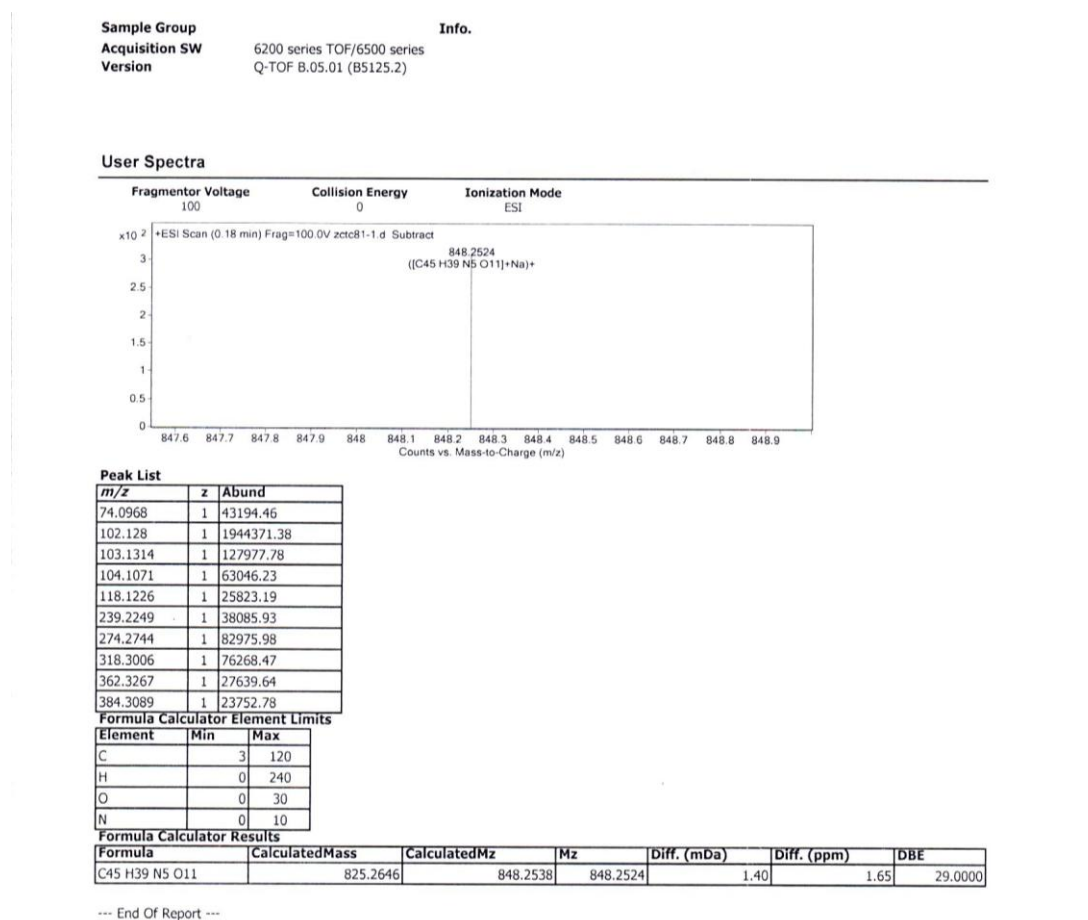



Figure S8. <sup>1</sup>H-NMR of compound 9

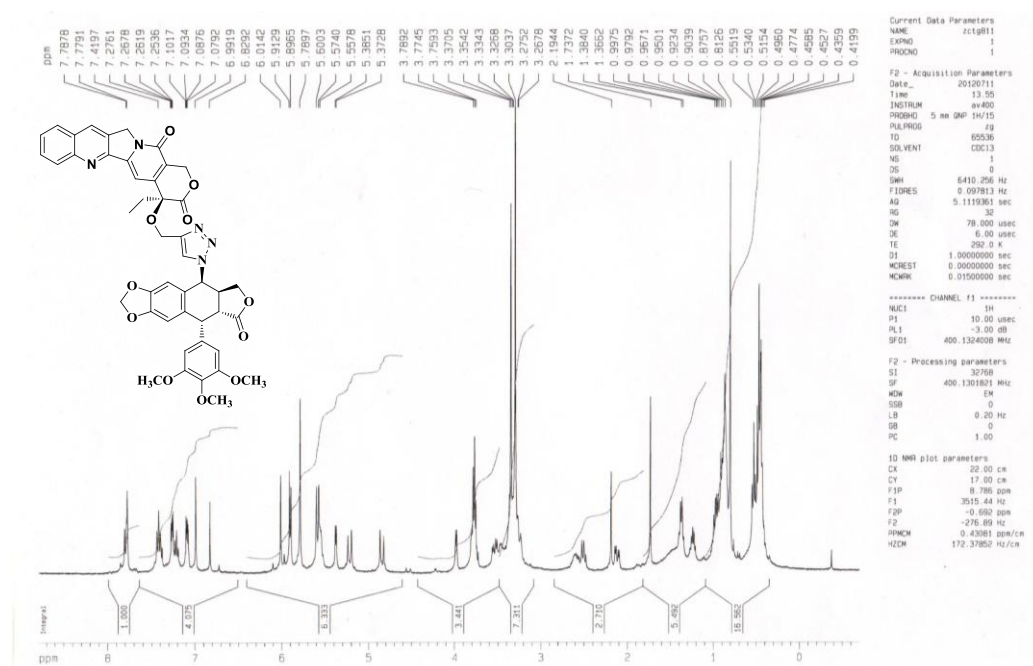

Figure S9. <sup>13</sup>C-NMR of compound 9

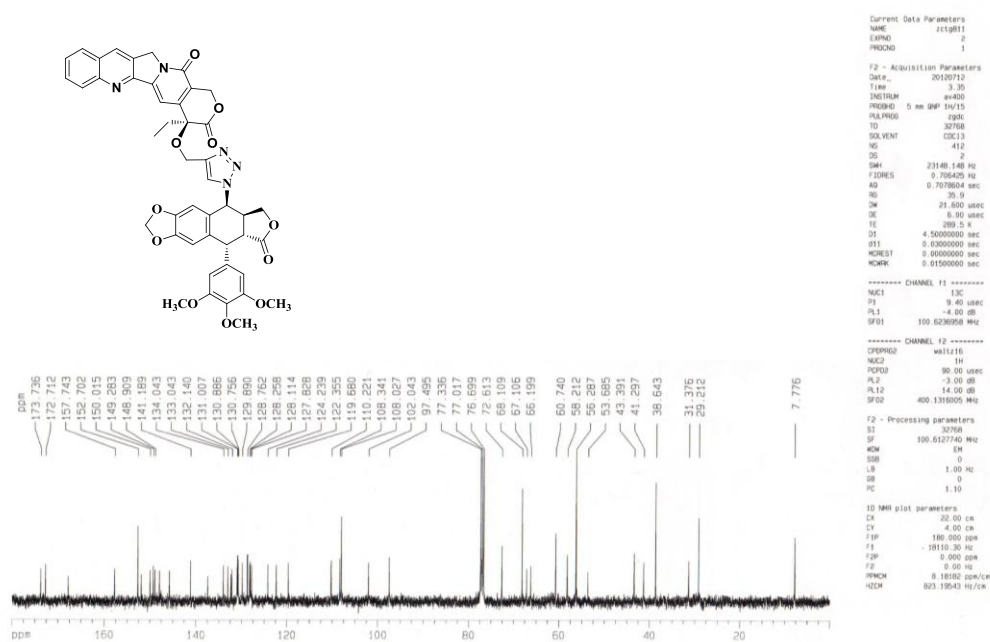

**Figure S10. HRESIMS of compound 10**

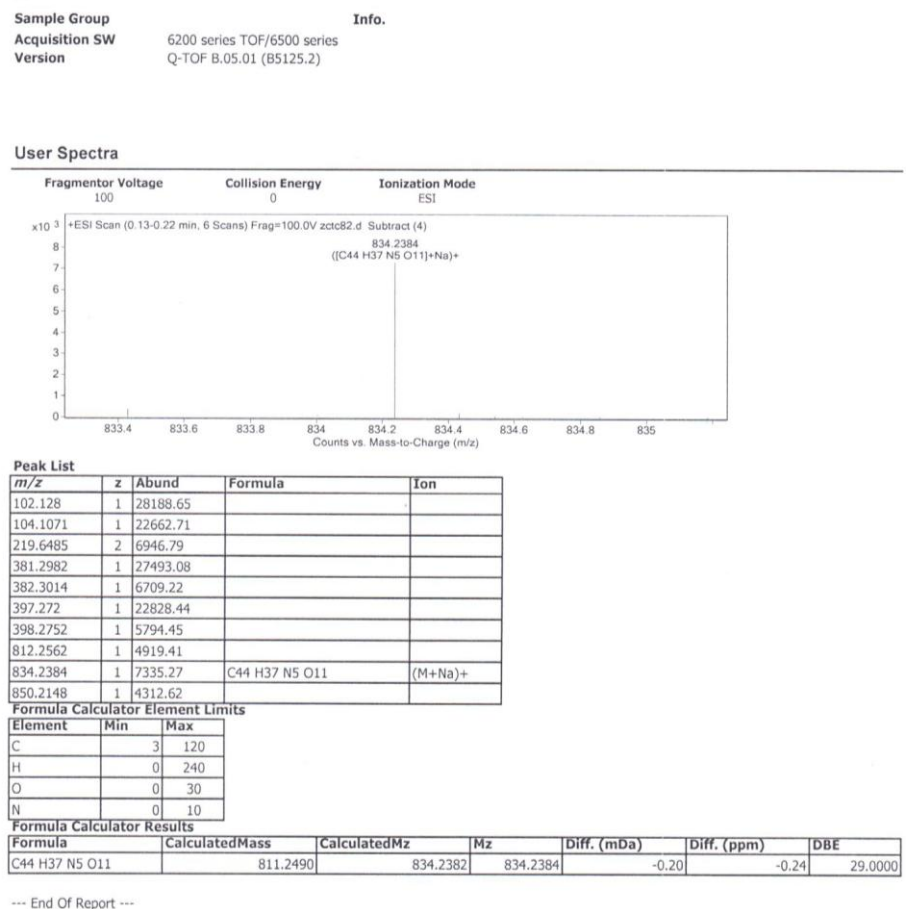

**Figure S11.  $^1\text{H}$ -NMR of compound 10**

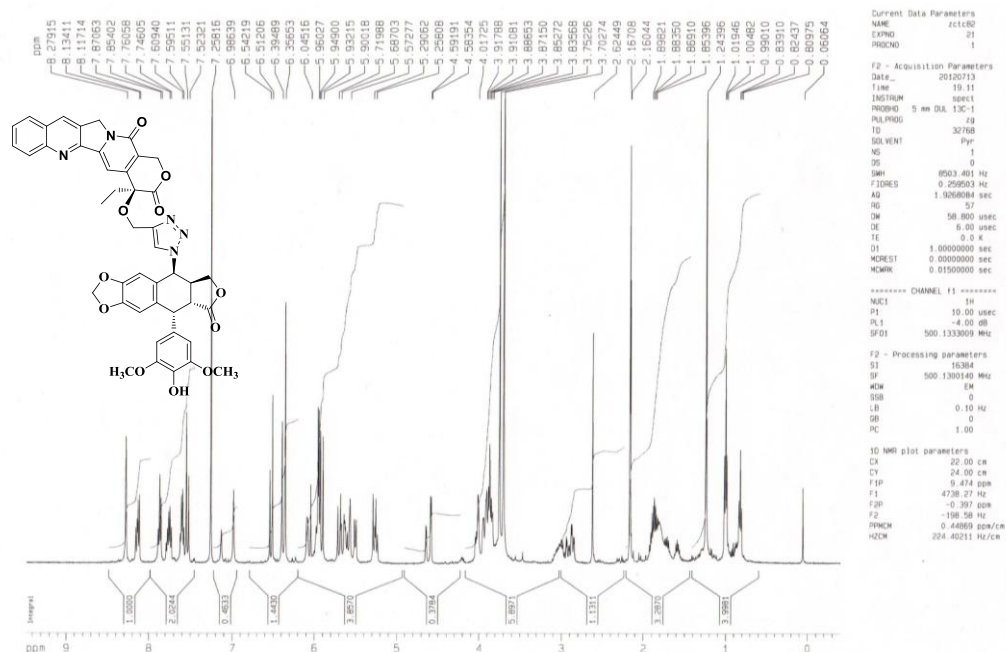

**Figure S12.  $^{13}\text{C}$ -NMR of compound 10**

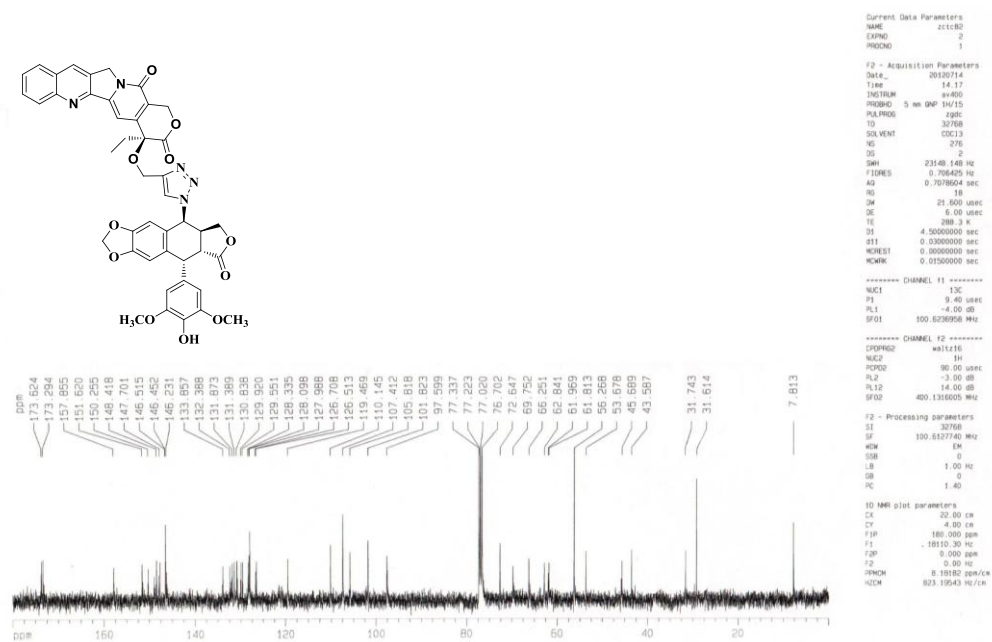

## References

- Hansen HF, Jesen RB, Willumsen AM, Norsko-Lauritsen N, Ebbesen P, Nielsen PE, Buchardt O. 1993. New compounds related to podophyllotoxin and congeners: Synthesis, structure elucidation and biological testing. *Acta. Chem. Scand.* 47:1190–1200.
- Kamal A, Kumar BA, Arifuddin M. 2003. A one-pot, efficient and facile synthesis of 4-arylaminopodophyllotoxins: synthesis of NPF and GL-331 as DNA topoisomerase II inhibitors. *Tetrahedron Lett.* 44(46):8457–8459.
- Kuhn M, Kellero-Juslén C, von Wartburg A. 1969. Partialsynthese von 4'-Demethylepipodophyllotoxin. 22. Mitteilung über mitosehemmende Naturstoffe [1]. *Helv. Chim. Acta* 52(4):944–947.
